# Supplementary material for: A Neoteric Feature Extraction Technique to Predict the Survival of Gastric Cancer Patients
Source: MDPI journal article supplement (doi:10.3390/diagnostics14090954), 2024-05-01
Supplement: s1 [file s1]

# A Neoteric Feature Extraction Technique to Predict Survival of Gastric Cancer Patients

Warid Islam <sup>1</sup>, Neman Abdoli <sup>1</sup>, Tasfiq E. Alam <sup>2</sup>, Meredith Jones <sup>3</sup>, Bornface M. Mutembei <sup>3</sup>, Feng Yan <sup>3</sup> and Qinggong Tang <sup>3\*</sup>

<sup>1</sup> School of Electrical & Computer Engineering, University of Oklahoma, Norman, OK 73019, USA

<sup>2</sup> School of Industrial & Systems Engineering, University of Oklahoma, Norman, OK 73019, USA

<sup>3</sup> Stephenson School of Biomedical Engineering, University of Oklahoma, Norman, OK 73019, USA

\* Correspondence: qtang@ou.edu (Q.T.)

Below are some example images of patients with gastric cancer.

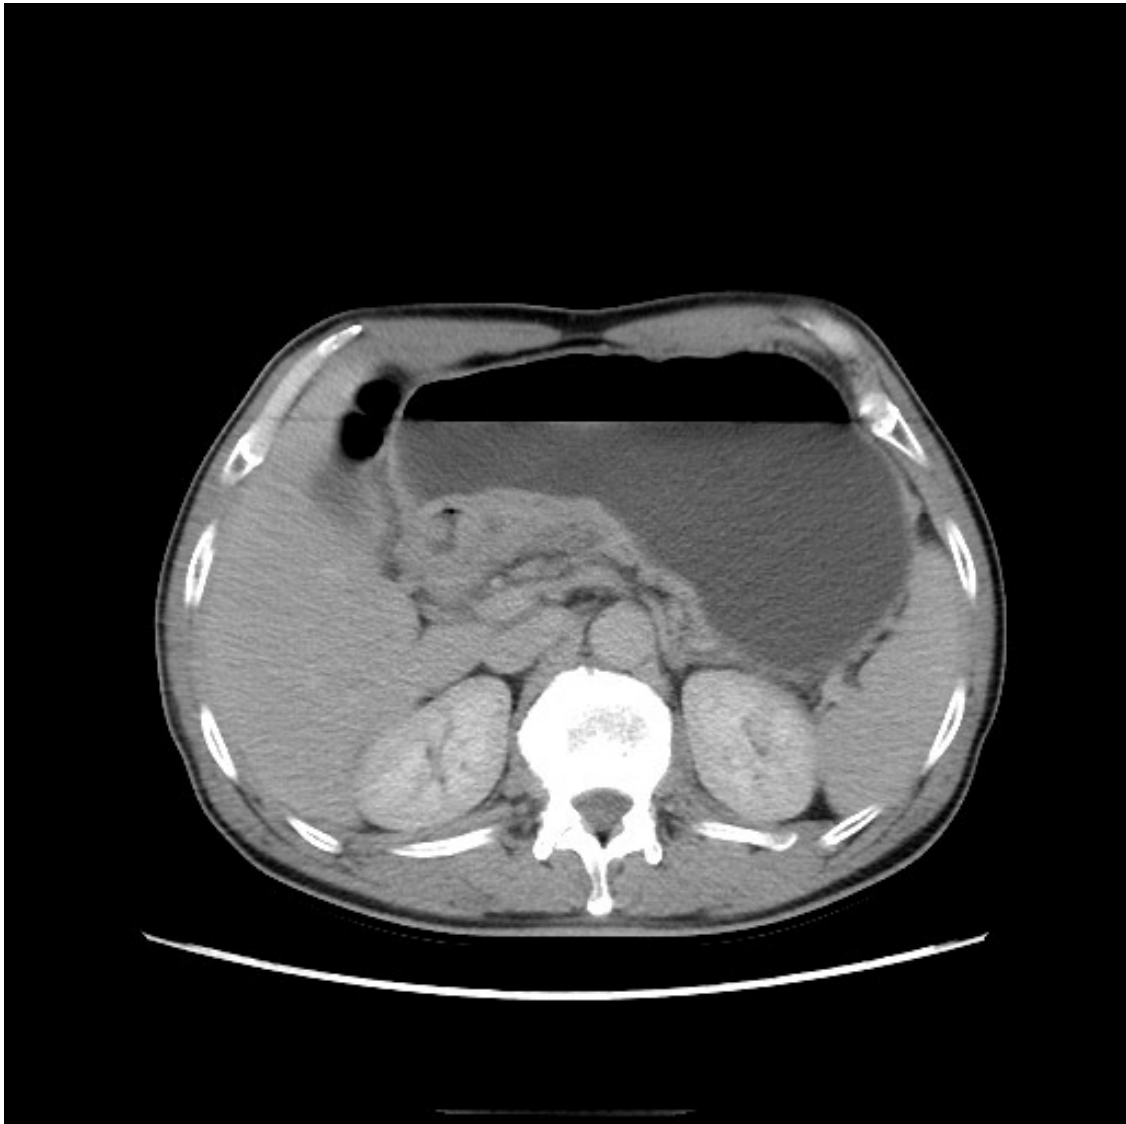

(a)

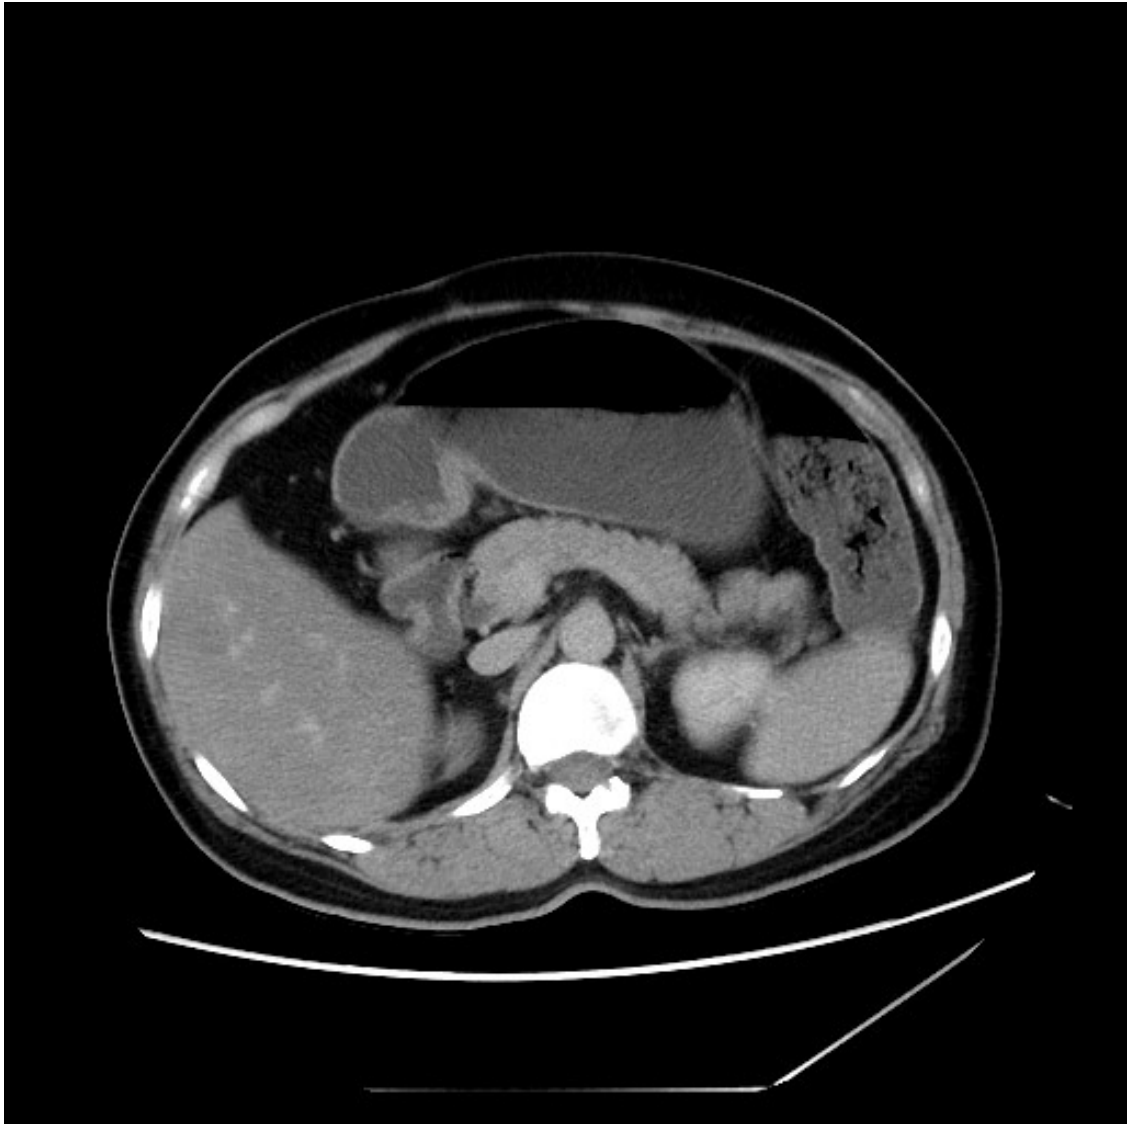

(b)



(c)



(d)

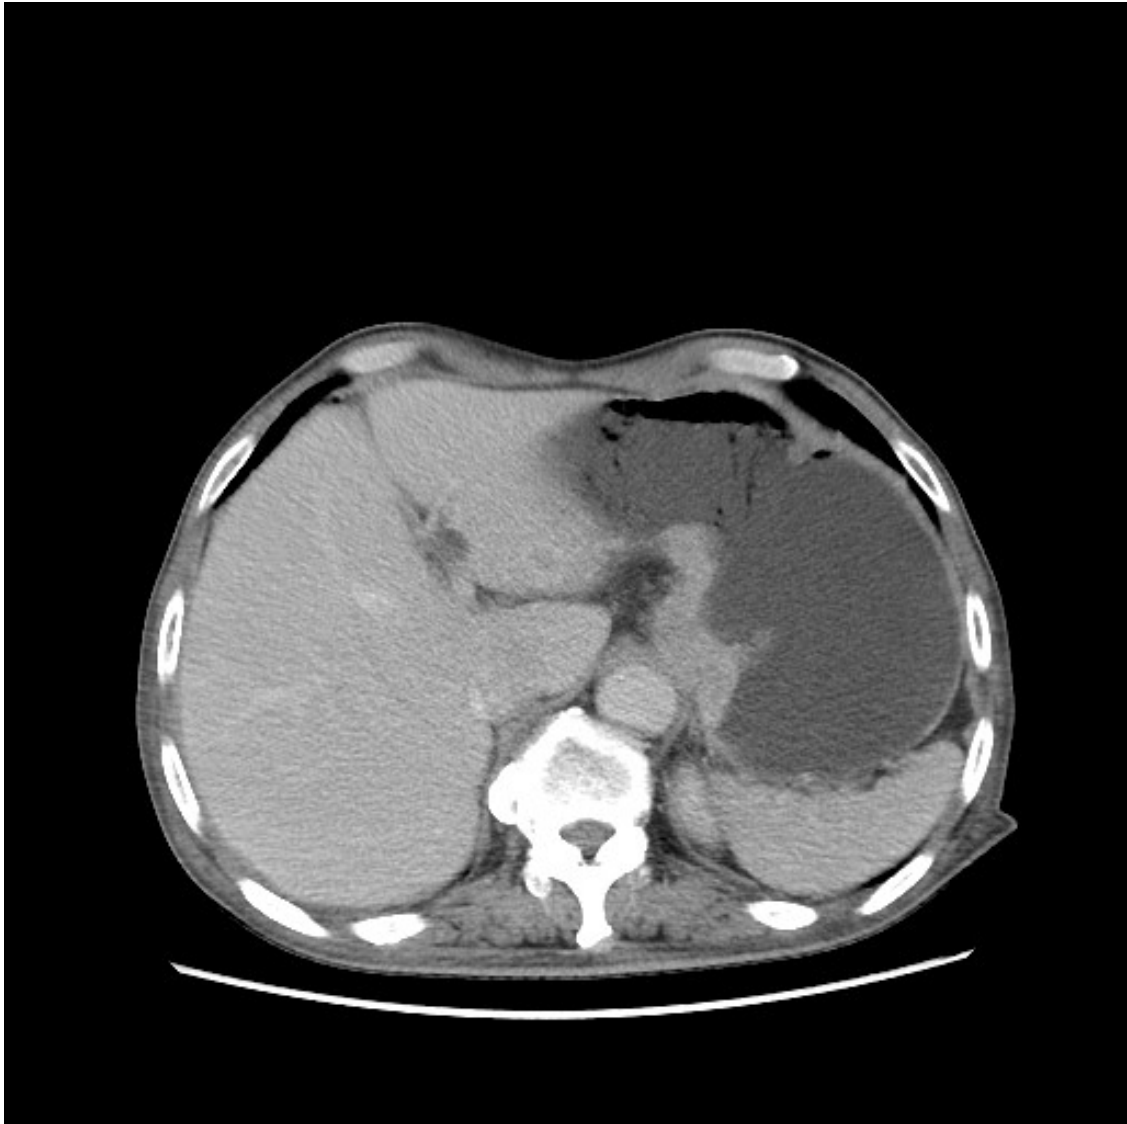

(e)



(f)



(g)



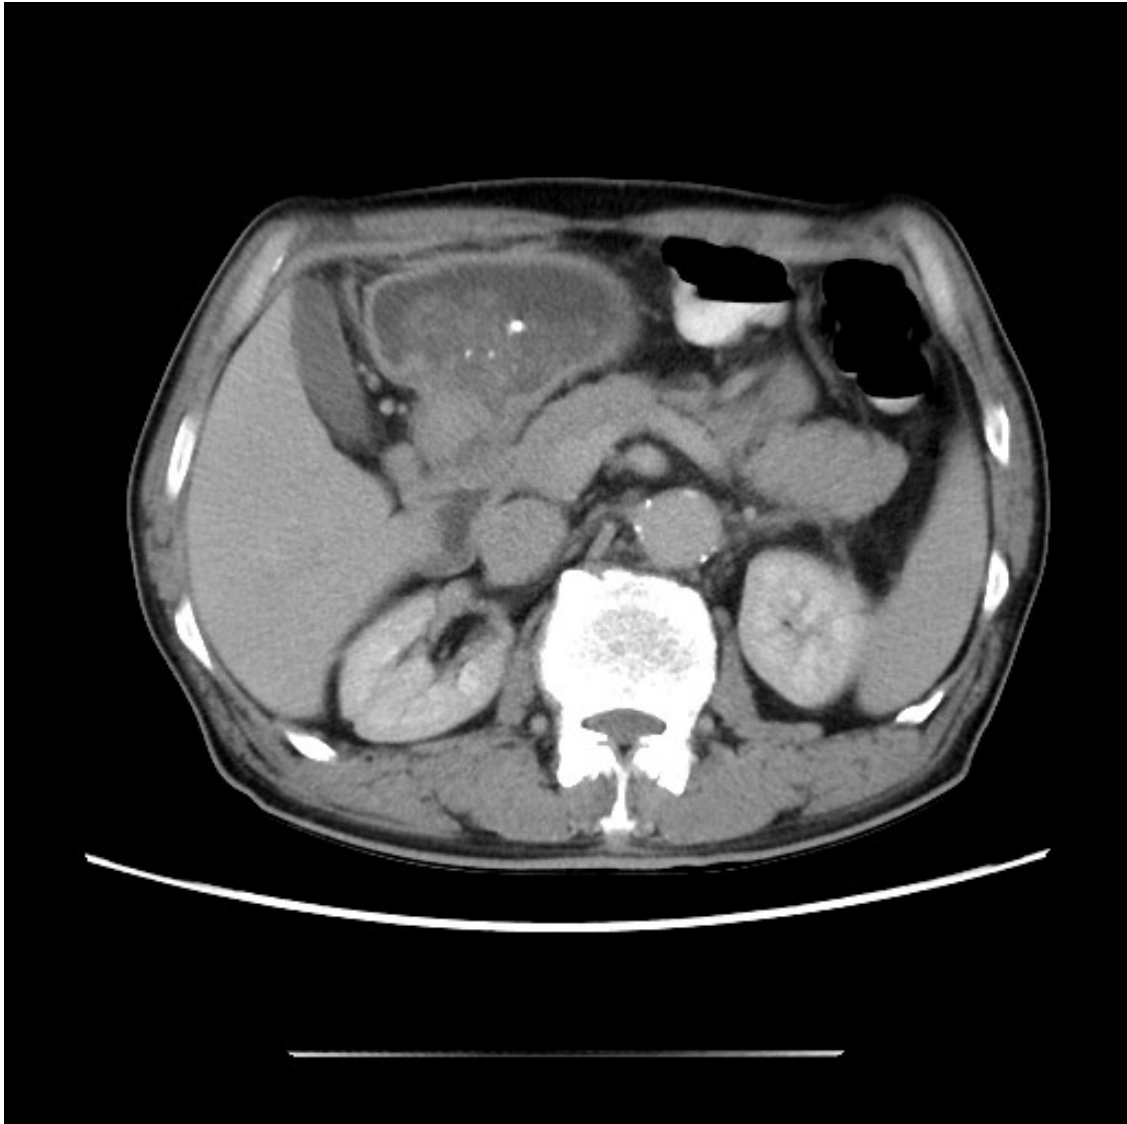

(h)



(i)

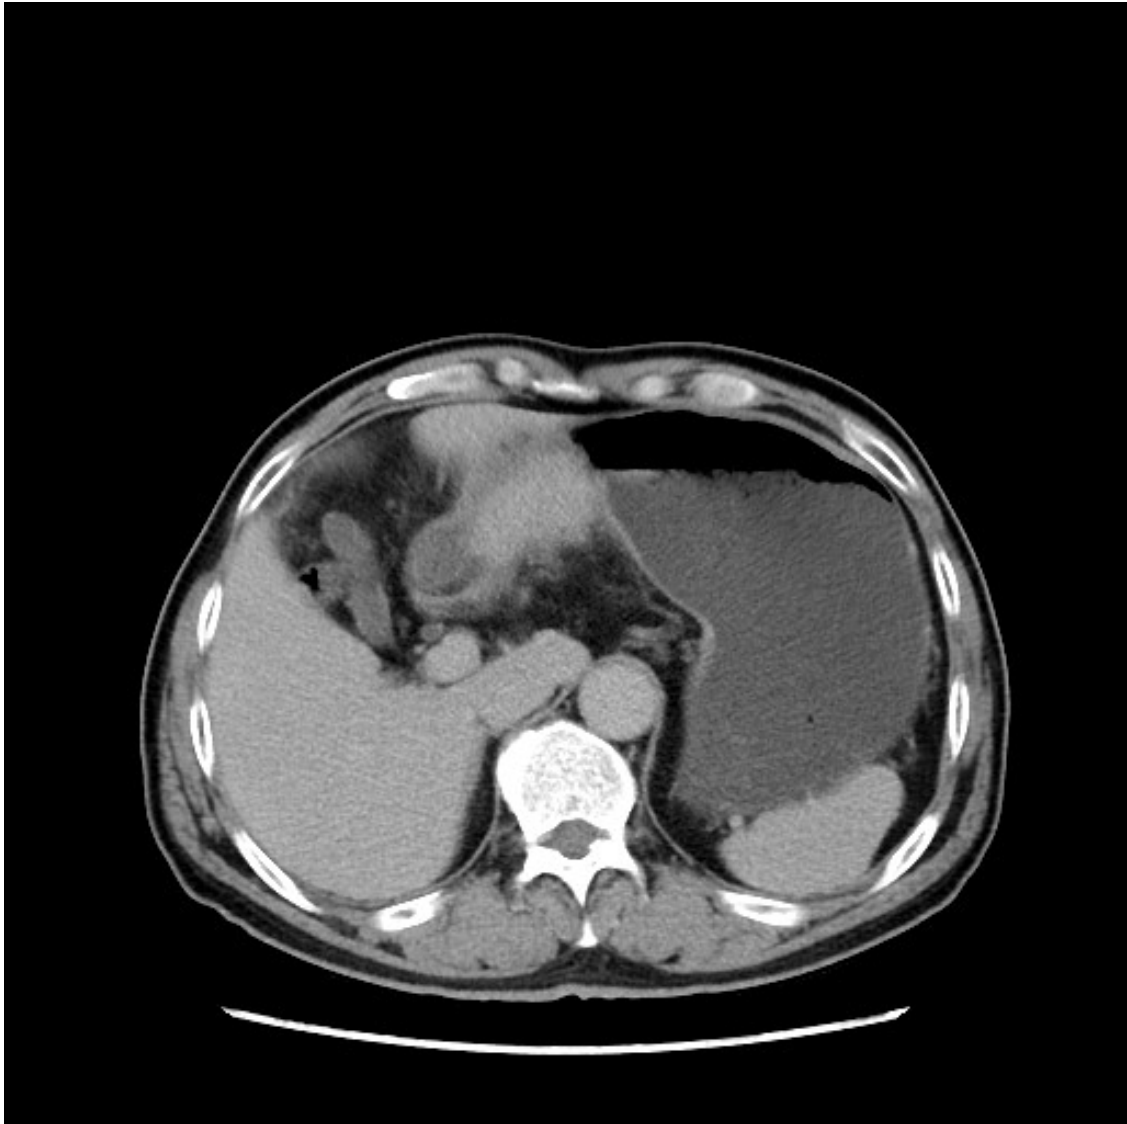

(i)

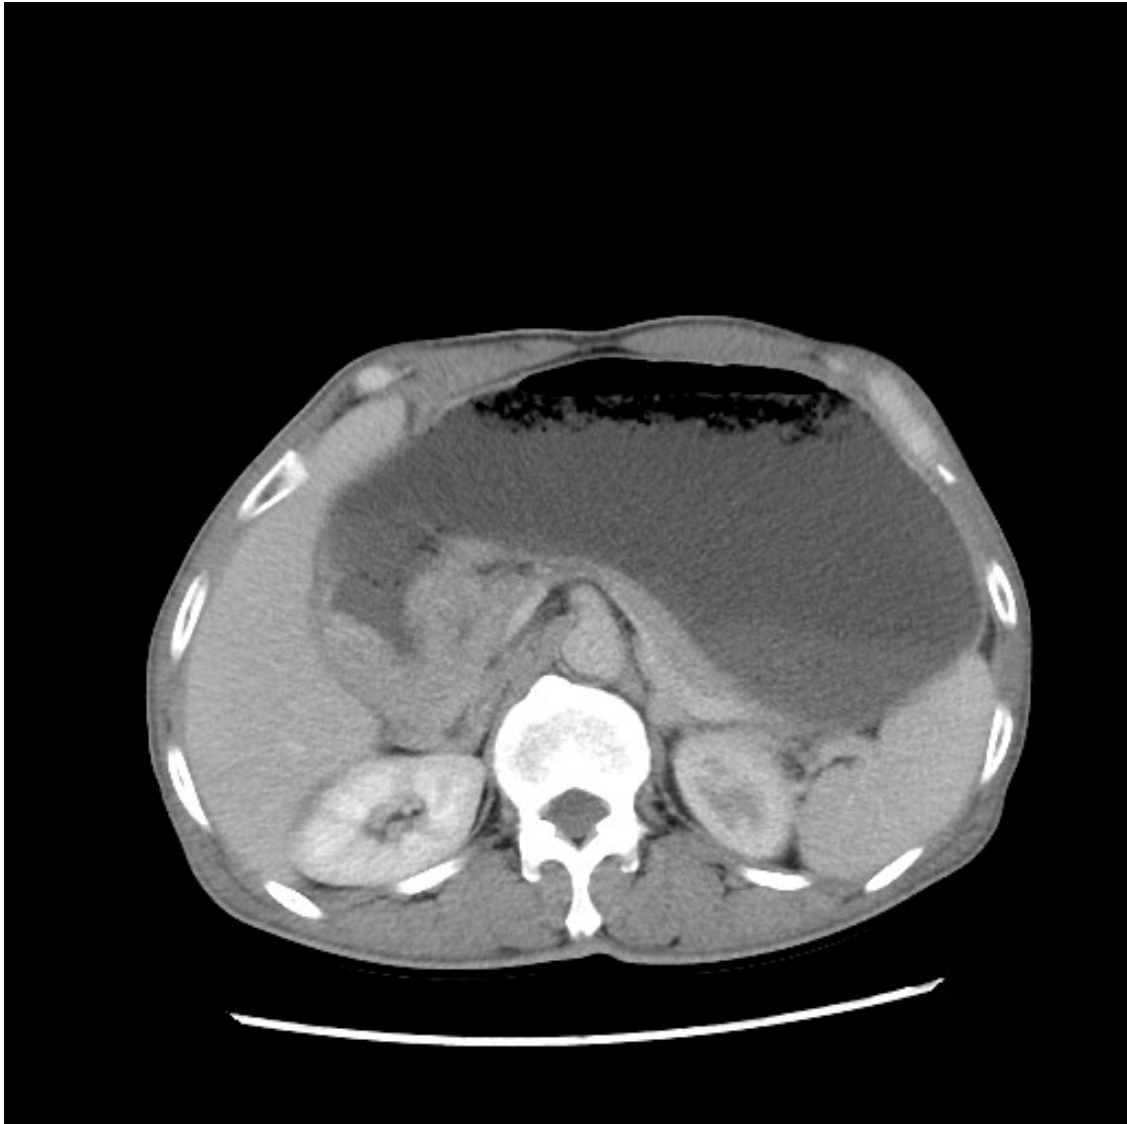

(k)

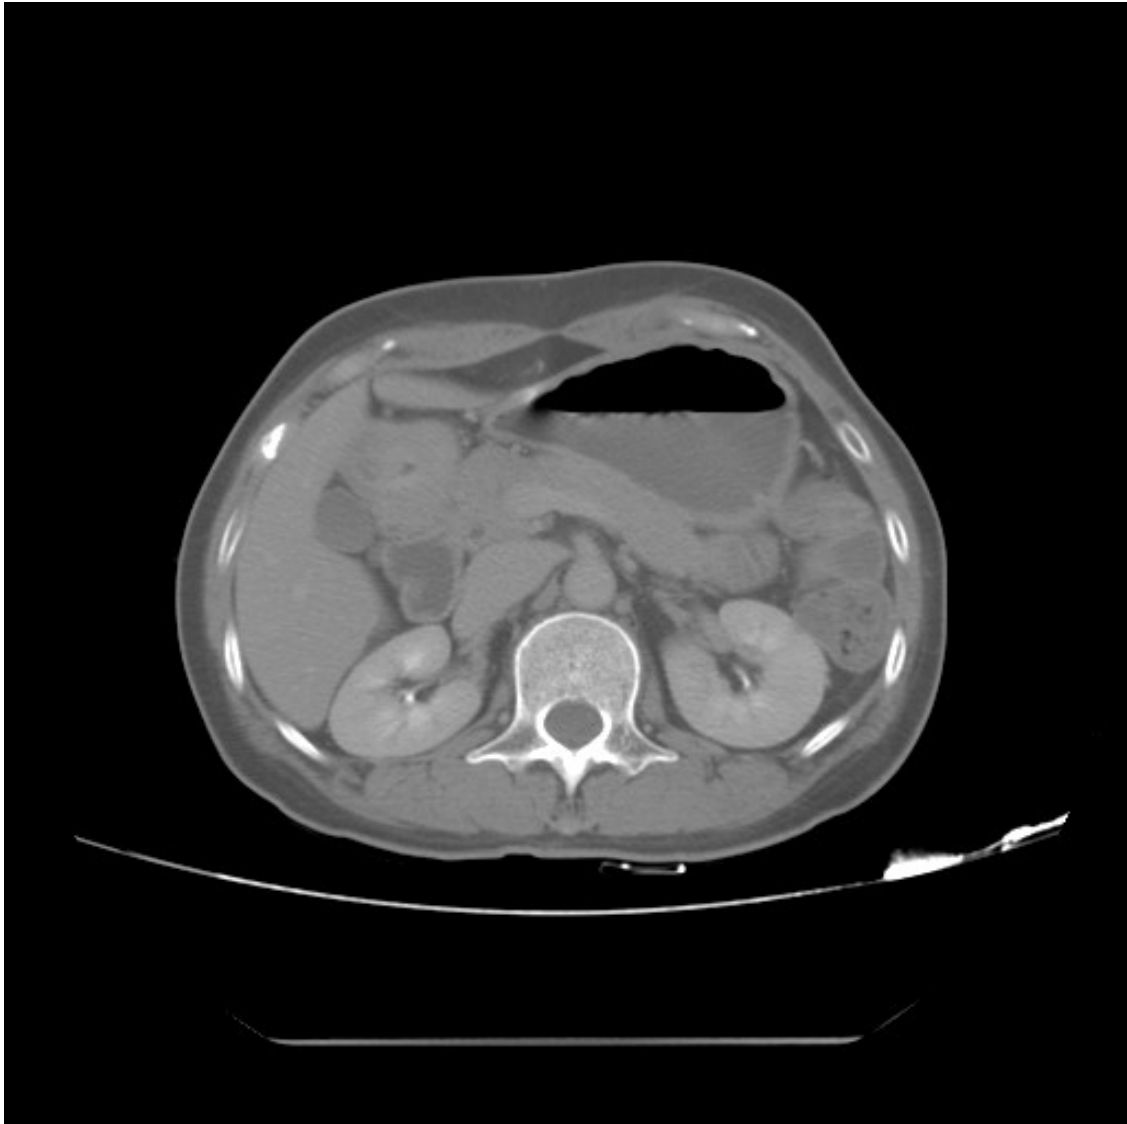

(1)



(m)



(n)

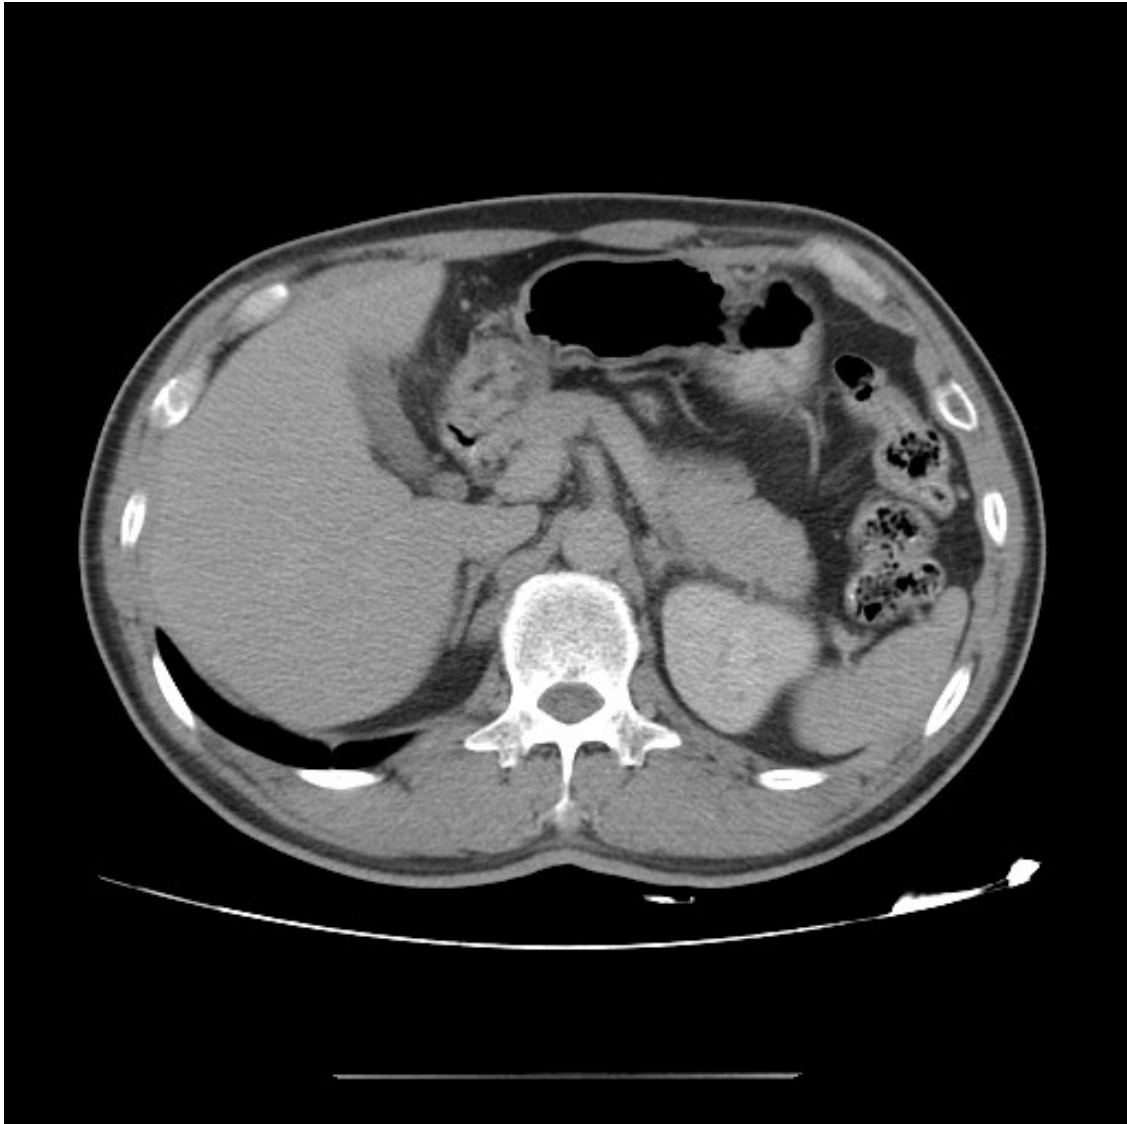

(o)



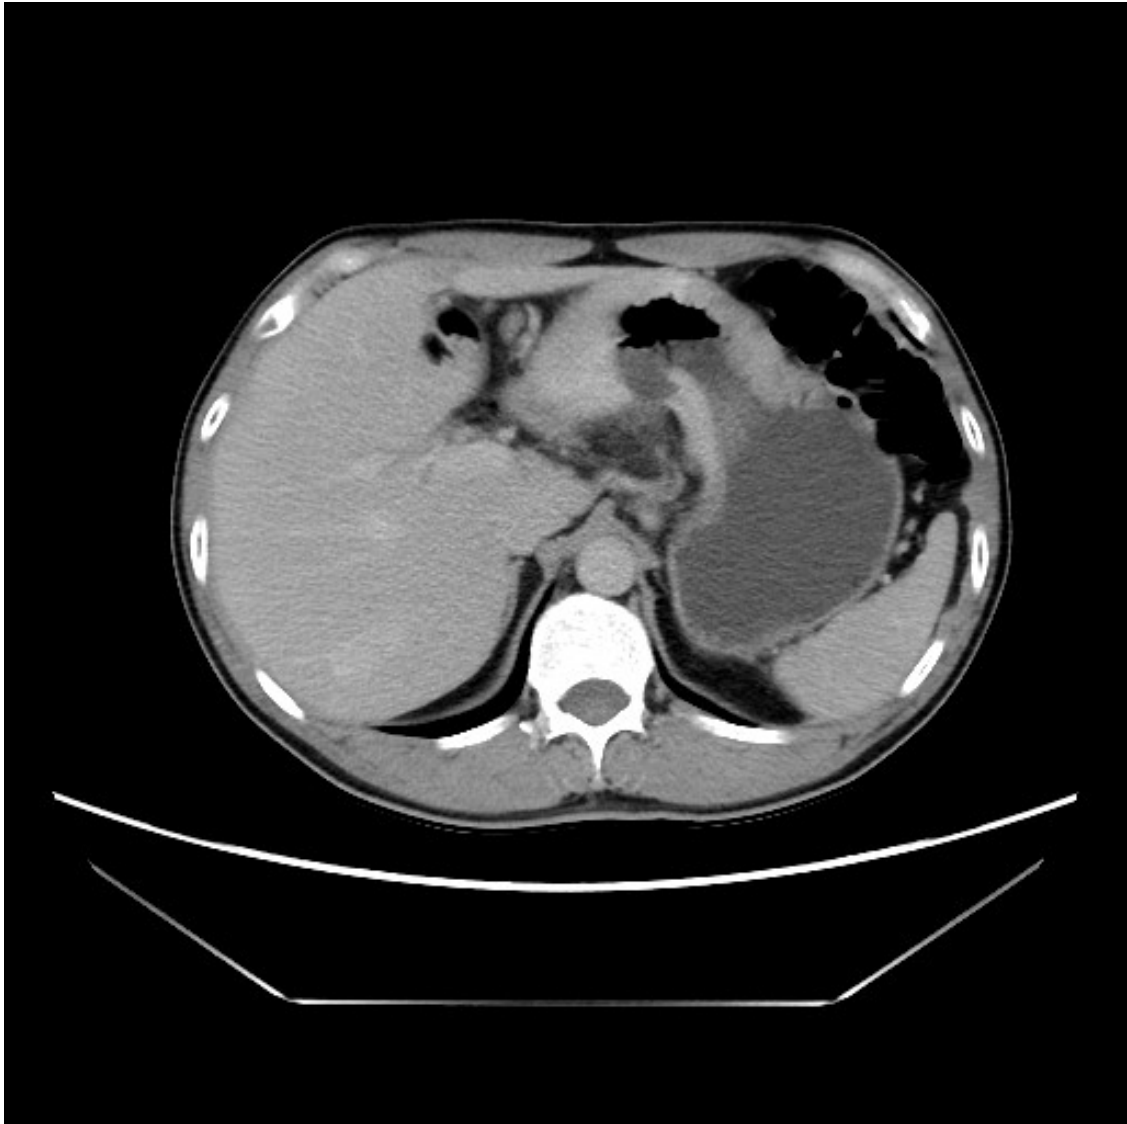

(P)

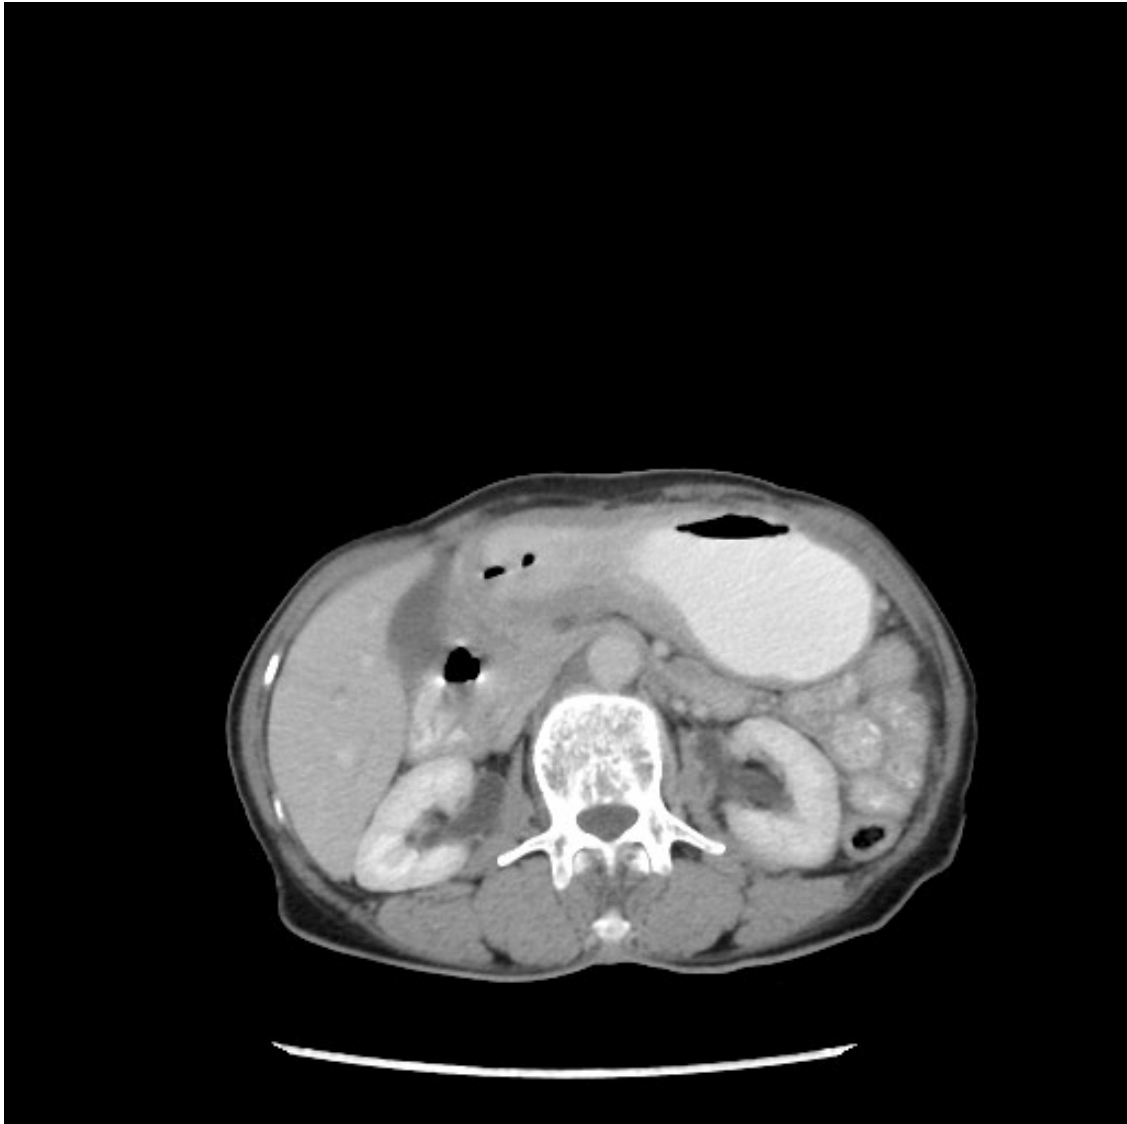

(q)

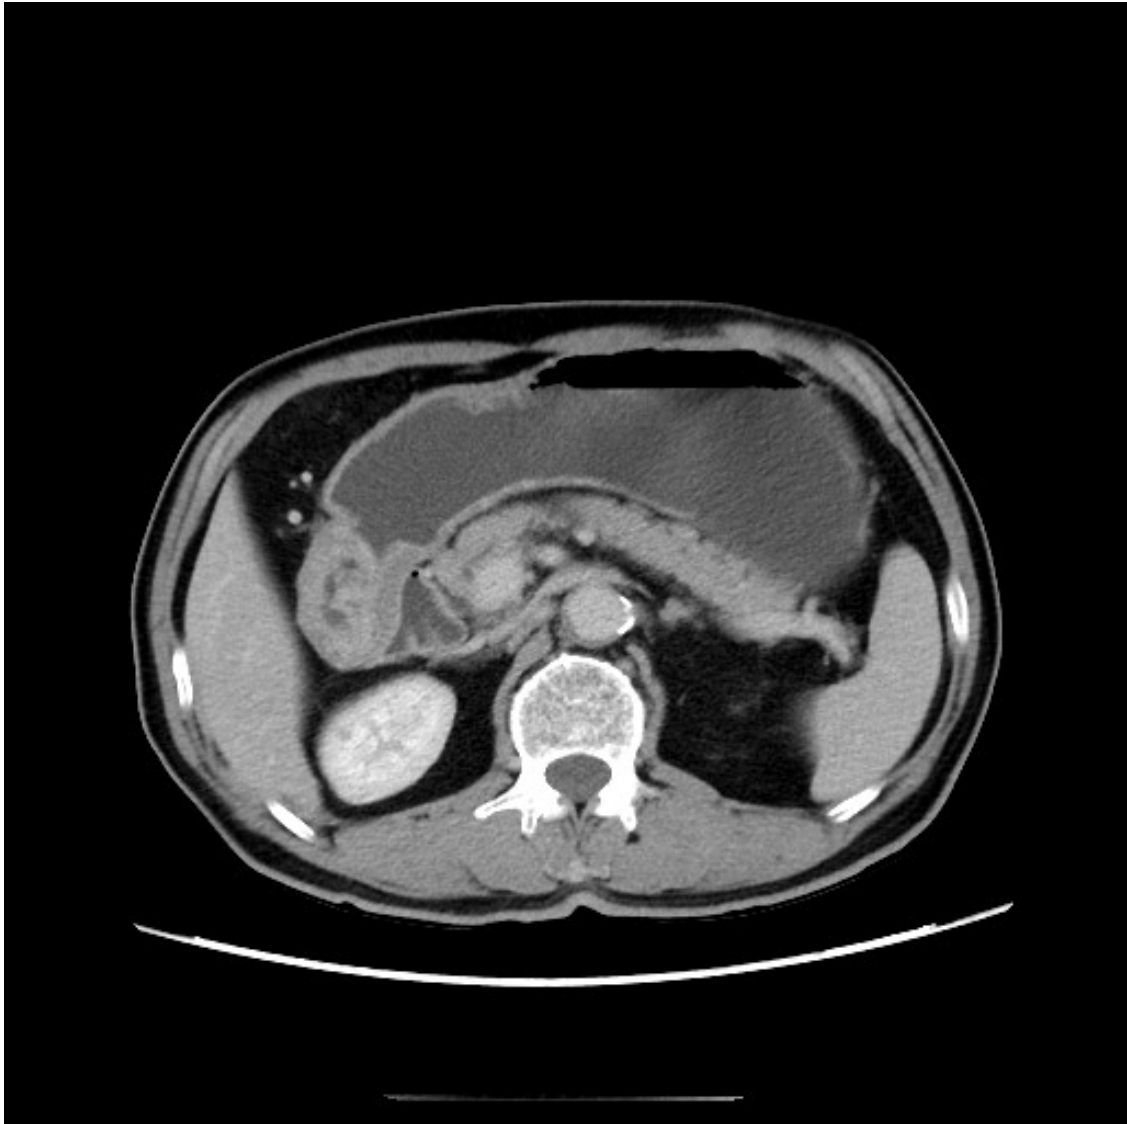

(r)

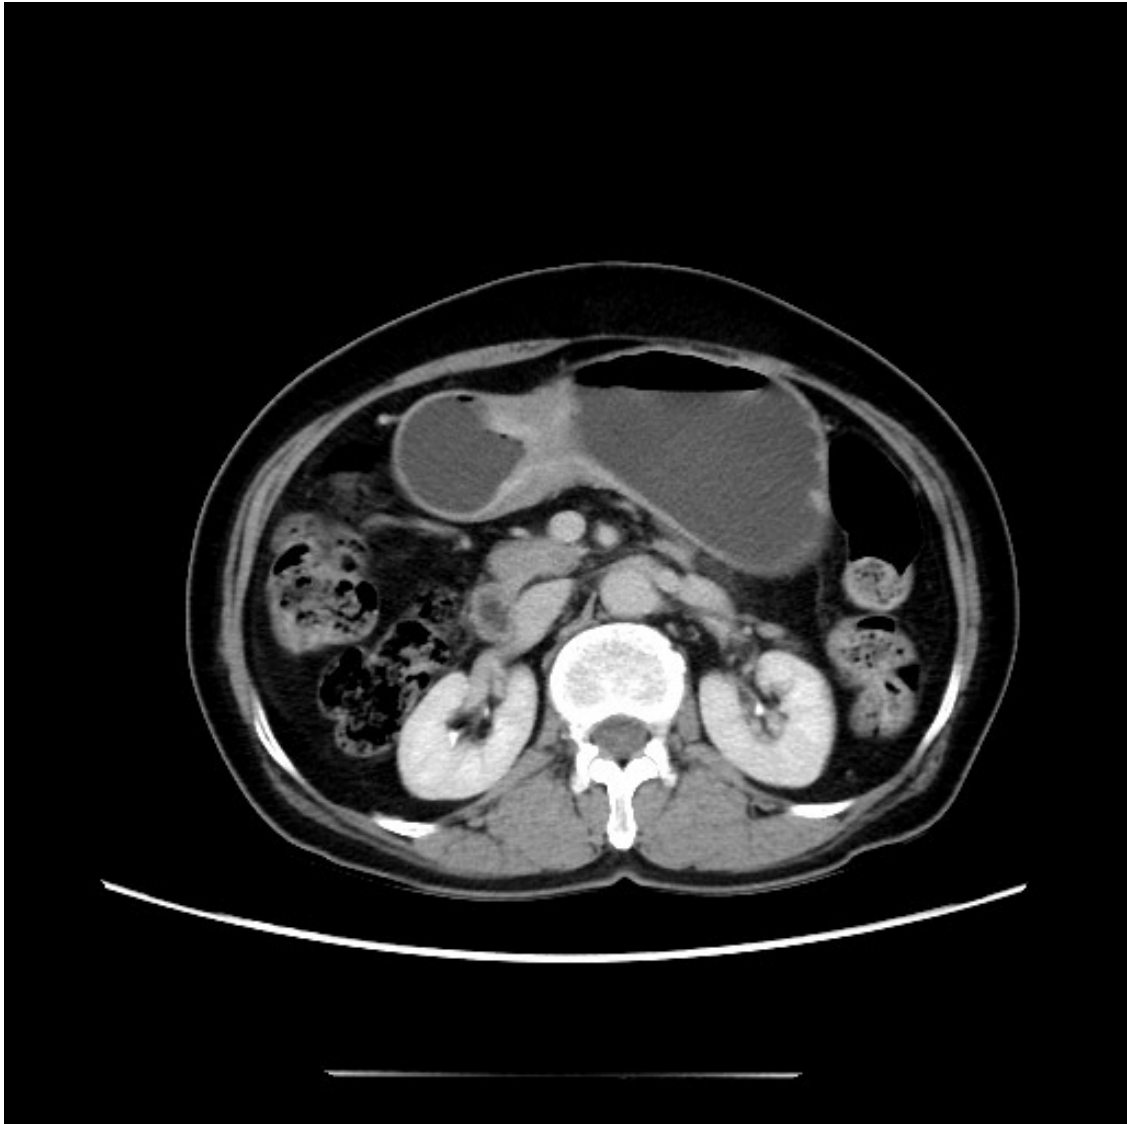

(s)

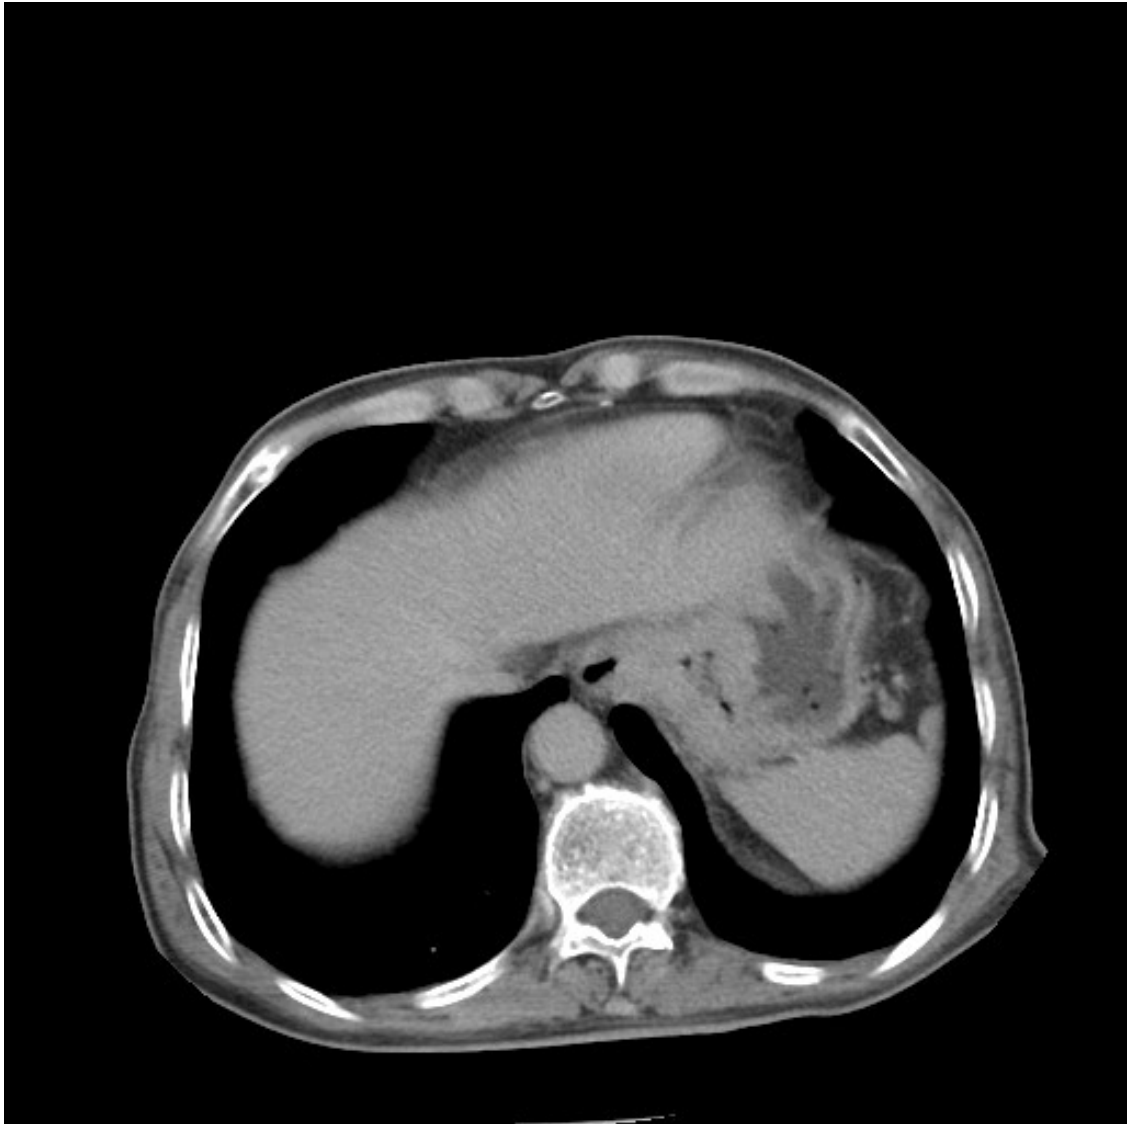

(t)

**Figure S1.** (a–t) Examples of patients with gastric cancer.

Here are a few examples showcasing the segmented tumor regions on a single CT slice.

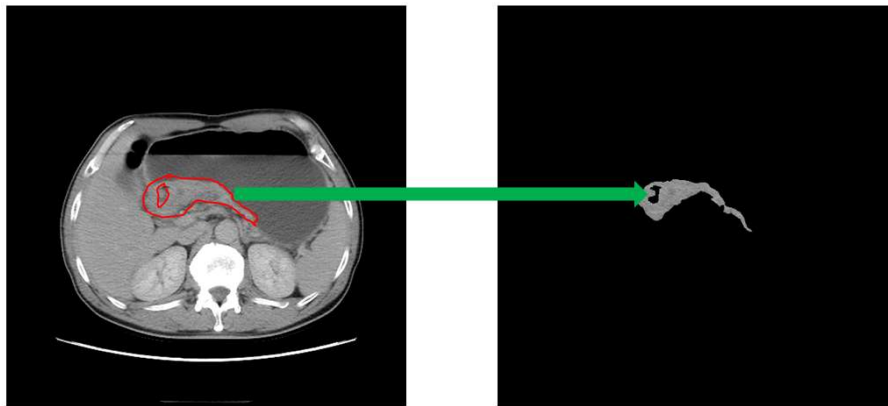

(a)

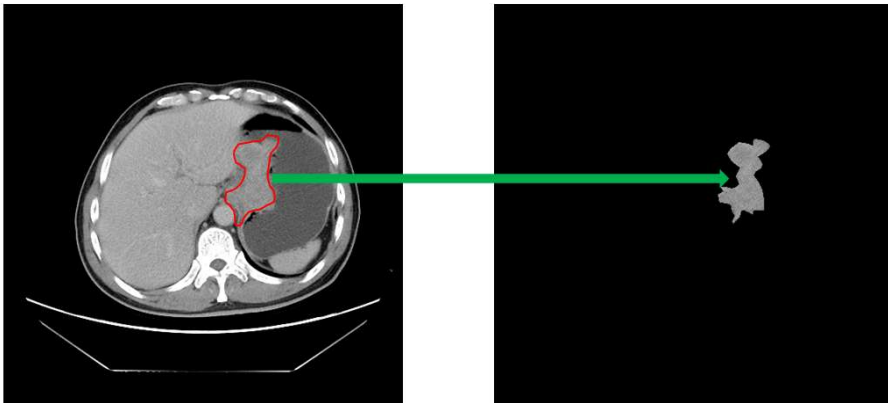

(b)

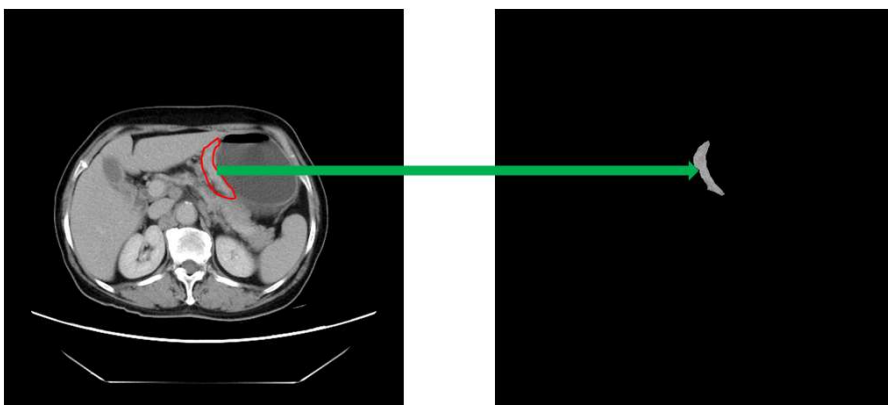

(c)

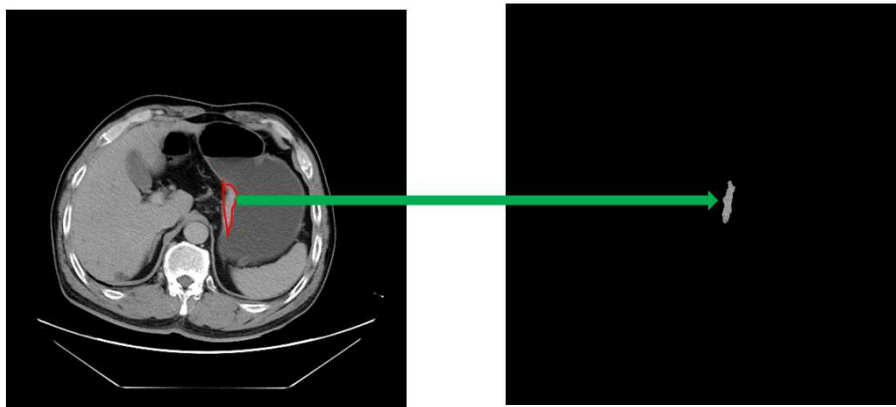

(d)

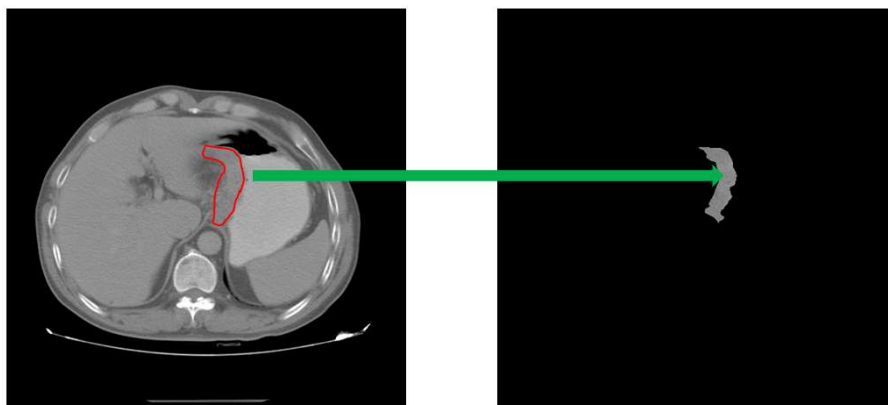

(e)

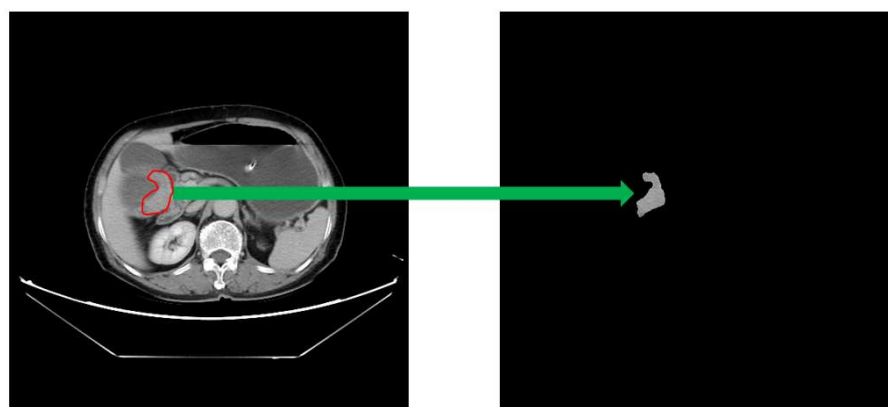

(f)

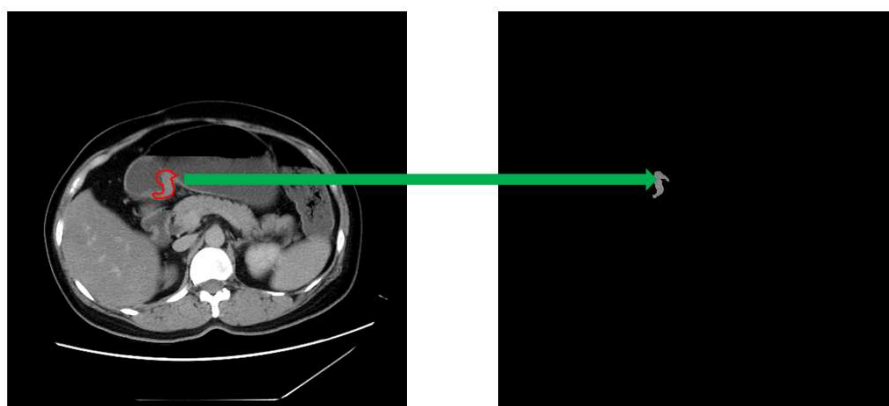

(g)

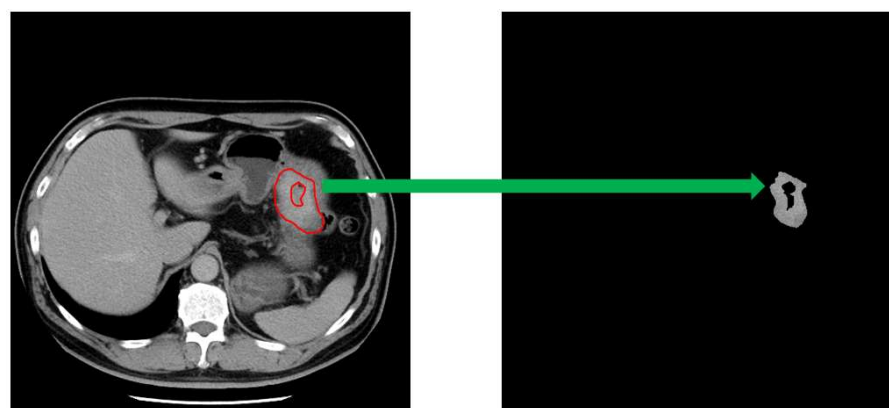

(h)

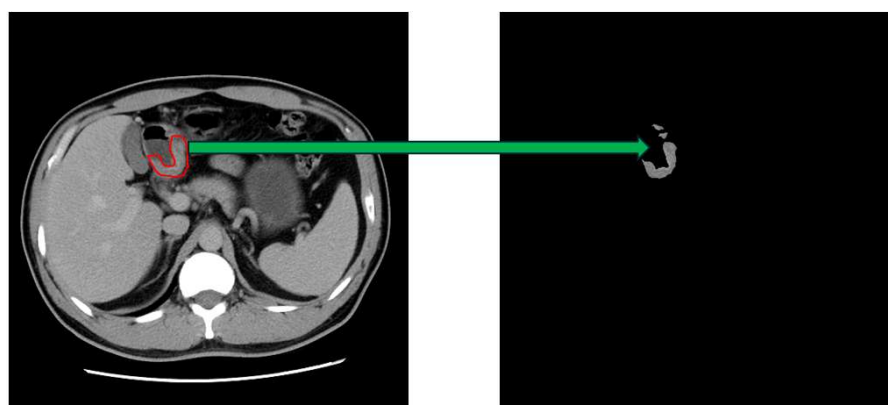

(i)



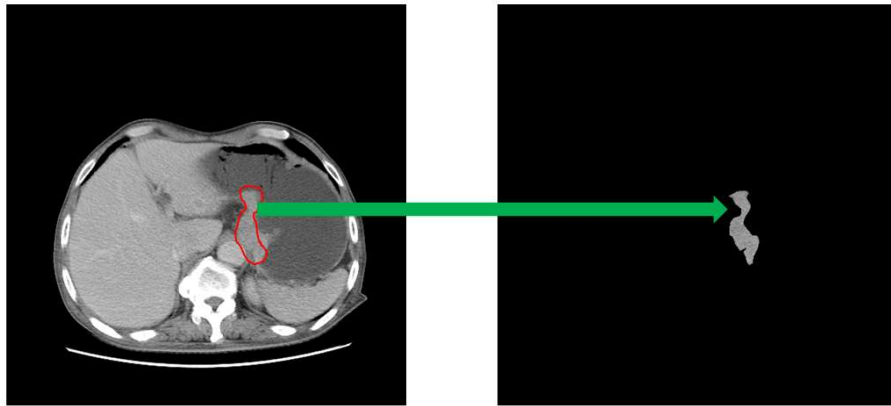

(j)

**Figure S2.** (a–j) Examples of illustrating the segmented tumor regions on one CT slice.
